# Supplementary material
Source: ML conference proceedings conference paper supplement (https://proceedings.mlr.press/v70/yang17a.html)
Supplement: Supplementary file 3 [file yang17a-supp.zip]

Archive with 2 entries (2 files):
- appendix.pdf
- full.pdf
